1  
2  
3  
4  
5  
6  
7  
8  
9  
10  
11  
12  
13  
14  
15  
16  
17  
18  
19  
20  
21  
22  
23

# A Generalized Similarity Metric for Predicting Peptide Binding Affinity

Jacob Rodriguez<sup>1,2</sup>, Siddharth Rath<sup>1,2,3</sup>, Jonathan Francis-Landau<sup>1,4</sup>, Yekta Demirci<sup>5</sup>,  
Burak Berk Ustundag<sup>6</sup>, and Mehmet Sarikaya<sup>1,2,3,7,8\*</sup>

<sup>1</sup> GEMSEC, Genetically Engineered Materials Science and Engineering Center, University of Washington, Seattle, WA 98195, USA

<sup>2</sup> Department of Materials Science and Engineering, University of Washington, Seattle, WA 98195, USA

<sup>3</sup> Molecular Engineering and Science Institute, University of Washington, Seattle, WA 98195, USA

<sup>4</sup> Department of Mathematics, University of Washington, Seattle, WA 98195, USA

<sup>5</sup> Department of Electrical and Electronics Engineering, Middle East Technical University

<sup>6</sup> Department of Computer and Informatics Engineering, Istanbul Technical University

<sup>7</sup> Department of Chemical Engineering, University of Washington, Seattle, WA 98195, USA

<sup>8</sup> Department of Oral Health Sciences, University of Washington, Seattle, WA 98195, USA

\*Corresponding Author

E-mail: [sarikaya@uw.edu](mailto:sarikaya@uw.edu)

## 24 **Abstract**

25           The ability to capture the relationship between similarity and functionality would  
26 enable the predictive design of peptide sequences for a wide range of implementations  
27 from developing new drugs to molecular scaffolds in tissue engineering and biomolecular  
28 building blocks in nanobiotechnology. Similarity matrices are widely used for detecting  
29 sequence homology but depend on the assumption that amino acid mutational  
30 frequencies reflected by each matrix are relevant to the system in which they are applied.  
31 Increasingly, neural networks and other statistical learning models solve problems related  
32 to functional prediction but avoid using known features to circumvent unconscious bias.  
33 We demonstrated an *iterative* alignment method that enhances predictive power of  
34 similarity matrices based a similarity metric, the Total Similarity Score. A generalized  
35 method is provided for application to amino acid sequences from inorganic and organic  
36 systems by benchmarking it on the debut quartz-binder set and 3 peptide-protein sets  
37 from the Immune Epitope Database. Pearson and Spearman Rank Correlations show  
38 that by treating the gapless Total Similarity Score as a predictor of relative binding affinity,  
39 prediction of test data has a 0.5-0.7 Pearson and Spearman Rank correlation. with  
40 respect to size of dataset. Since the benchmarks used herein are from a solid-binding  
41 peptide and a protein-peptide system, our proposed method could prove to be a highly  
42 effective general approach for establishing the predictive sequence-function relationships  
43 of among the peptides with different sequences and lengths in a wide range of  
44 biotechnology, nanomedicine and bioinformatics applications.

45

46

## 47 **Introduction and Background**

48           The rapid development of target-specific drugs relies on the development of high-  
49 throughput and accurate methods of modelling molecular structures. The biology,  
50 pharmacology and bioengineering communities are interested in building widely  
51 applicable methods founded in predictive design of molecules that have specificity for  
52 biological targets, analytes and biomarkers [1-4]. Small peptides (7 to 40 amino acids)  
53 have high potential as both therapeutics [5-7] and high-performance molecular building  
54 blocks [8-10] due their diversity of binding affinity both quantitatively and specifically  
55 across 2D- and nano-materials.

56           Towards more accurate and fast predictions of affinity or conformation that would  
57 enable high-throughput drug and targeting peptide design, among some of the best  
58 performing methodologies are stochastic models such as NetMHCpan-4.0 [11],  
59 DeepMHC [12] and MHCflurry [13]. These methods use little or no prior information about  
60 the peptides to ensure only random walk identifies relevant patterns. By avoiding  
61 physiochemical properties published in the literature, these models are subject to  
62 inconsistent predictions between test peptide sets even for the same protein target.  
63 Alignment-free neural networks models have shown substantial success in predicting the  
64 binding affinity of the Immune Epitope Database (IEDB, [www.iedb.org](http://www.iedb.org)) datasets [12,14].  
65 To avoid overfitting, they require hundreds of thousands of sequences and are not  
66 optimized for gaps in the binding domains [15,16].

67           The current state of the art in modelling tools, e.g., molecular dynamics (MD),  
68 molecular mechanics (MM), and Monte Carlo (MC) based methods, predict overall  
69 conformation from which binding energies may be calculated [9]. These approaches

70 utilize knowledge-based force fields [17,18] and energy minimization techniques to  
71 sample the most probable structures [19]. Though solving conformational structures will  
72 likely enable the most accurate predictions of peptide function, to date structural  
73 information is avoided in models requiring large amounts of data. This is mostly due to  
74 the large computational cost associated with calculating molecular structures of these  
75 large molecules, which is a barrier to the development of both highly complex neural  
76 networks and current MD/MC-based methods. The deeper networks rely less on learning  
77 in space constrained by verified physiochemical trends and more on the number of  
78 parameters and computational power. Less complex and more interpretable models  
79 integrate known patterns while leaving space for optimization methods to learn unknown  
80 patterns in the sequences.

81 Current alignment-based methods for high-throughput prediction functionality of  
82 amino acid sequence information can be separated into two groups; pairwise [20-22] and  
83 multiple sequence [16,23,24]. In general, pairwise alignment is ideal for shorter  
84 sequences due to its higher computational cost per amino acid and is widely accepted to  
85 be the optimal alignment [25]. Multiple sequence alignment is considered more  
86 appropriate for longer sequences with suspected consensus domains. In both methods  
87 Point Accepted Mutation (PAM) and Blocks Substitution Matrix (BLOSUM) matrices are  
88 still the most widely used, and there are permutations of these matrices to serve more  
89 specific tasks [17,26,27]. Overall, the limitations of PAM and BLOSUM provided  
90 inspiration and guidance for generating matrices with increased accuracy based on larger  
91 and more complete datasets [11,28-30]. Matrices such the PMBEC [27], have been  
92 generated based on the two models that produce a minor increase in performance but

93 ultimately are vulnerable to the same factors as their predecessors [11]. In 2008, for  
94 example, a miscalculation was discovered in the clustering protocol of the BLOSUM  
95 matrix [31]. Despite extensive characterization of the mistake, BLOSUM is still the  
96 standard for one of the largest alignment-capable databases available to date, BLAST  
97 [11].

98 In contrast with PAM, BLOSUM, PMBEC [26] and the SAUSAGE Force Field  
99 Matrix [16], the novel OCSimM and 8 property group-derived matrices (A-RMat) were  
100 calculated from 527 physiochemical properties of amino acids [32,33]. AAindex is a vast  
101 resource of high-quality amino acid properties collected from literature dating from the  
102 mid-sixties to today [32,33]. Typically, either variable reduction methods (Principal  
103 Component Analysis [6,34] or Factor Analysis [35]) or heuristic selection is performed to  
104 shrink the huge dataset of over 550 amino acid properties to obtain an interpretable  
105 solution. Variable reduction has significant advantages over a global analysis of  
106 heuristically grouped properties because human error cannot influence the potential  
107 relationships observed [35]. However, these methods still assume the relationship  
108 between high-specificity peptides and low-specificity peptides is described by  
109 physiochemical properties.

110 Previously, we have successfully used a matrix optimization method to a group of  
111 peptides that were categorized as strong, weak or medium binders based on their binding  
112 affinities to crystalline silica, quartz, using 40 sequences that were originally genetically  
113 selected using M13 phage display peptide library [25]. The novel metric called the Total  
114 Similarity Score (TSS<sub>A-B</sub>) describes the average Global Alignment score of all peptides  
115 from group-A to all of group-B [25]. The TSS score quantifies the similarity of a peptide to

116 a functional peptide set (i.e. affinity for a solid material). By keeping random changes to  
117 a similarity matrix that increased the  $TSS_{S-S}$  (TSS of strong binders with strong binders),  
118 and decrease the  $TSS_{S-W}$  (TSS of strong binders with weak binders), a similarity matrix  
119 was obtained that could predict the semi-quantitative affinity of quartz-binding peptides  
120 with 70-80% success. Despite its high predictive power, TSS has never been applied to  
121 MHC data. Using the MHC data, here we demonstrate its implementation that strongly  
122 suggests that TSS could be a predictive method for establishing sequence-function  
123 relationships in a variety of large sequence-based data sets.

124 The reliable prediction of peptide binding affinity has already led to ground-  
125 breaking advances in oral health science and will continue to do so in areas requiring a  
126 well-described soft interface between peptides and solid-state inorganic materials  
127 [5,10,36]. Though affinity prediction is not the most descriptive or important  
128 characterization of peptides, understanding the relationship among solid-binding peptides  
129 [10] has led to many technologies such as sensors with high sensitivity, [5] assemblers in  
130 nanotechnology, and tiny enzymes in biomineralization [37].

## 131 **Approach and Methodology**

132 Iterative Alignment (IA) creates a scoring matrix that provides scores correlating  
133 with the positional composition of a peptide when compared to a weak and a strong  
134 binding set. When a sequence of interest has high similarity to these strong binders and  
135 low similarity to the weak binders, the sequence was given a higher  $TSS_{Seq-S}$  and lower  
136  $TSS_{Seq-W}$  (TSS of interesting sequence to weak binders). Training the similarity matrix  
137 was done by increasing the differences in TSS to strong binders for two binding affinity  
138 classes, strong and weak.

139 First, peptides were sorted by their affinity values shown in Fig 1A. The generated  
 140 trend was characterized by the positive correlation  $TSS_{Seq-S}$  with binding affinity visualized  
 141 in the lower bar chart of Fig 1B. Once training was finished, we calculated the TSS to  
 142 strong binders a final time for all peptides in the set. The results from the trained randomly  
 143 initialized matrix (RandM) are shown in the scatterplot in Fig 1C. Next, several methods  
 144 are used to measure correlation of  $TSS_{Seq-S}$  with the experimental affinity including  
 145 Pearson and Spearman Rank correlation, Root Mean Square Error and a binary  
 146 classification scheme (binder/nonbinder prediction). A sample of these results are  
 147 demonstrated in Fig 1D.

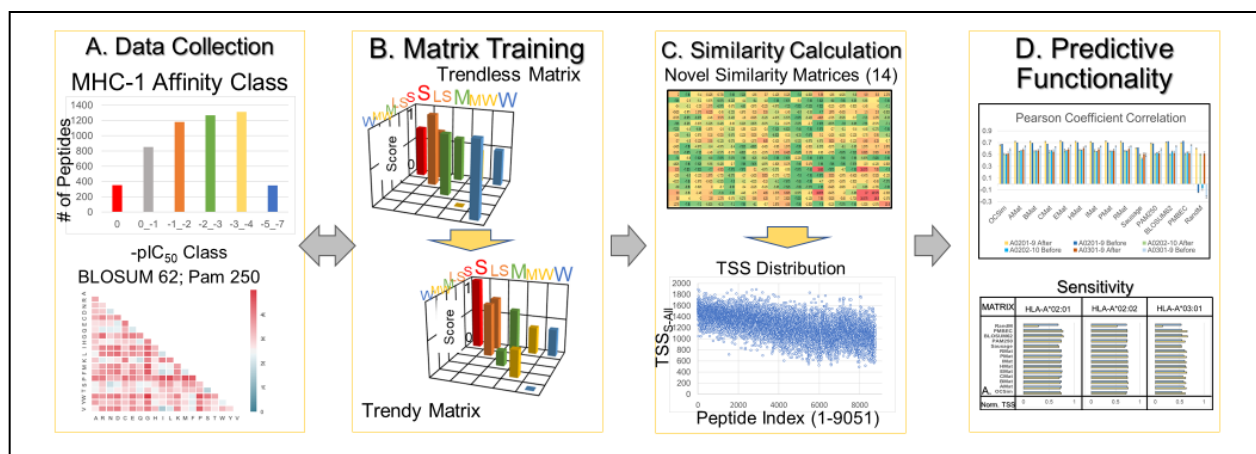

148 **Fig 1. Schematic of Iterative Alignment Procedure.** The iterative alignment procedure is executed  
 149 in four separate steps as show in the flow chart, that include: (A) Classification of MHC-I binding  
 150 peptides from the IEDB and the resultant matrices from AAindex; (B) Training the randomly  
 151 initialized matrix (RandM) which, before training, was incapable to demonstrate the trend of  
 152 decreasing cross-similarity, but after training it becomes prominent indicating the successful  
 153 integration of the information; (C) Demonstration the total similarity score of the full allele set with  
 154 respect to the strongest determined binders of *HLA-A\*02:01* ( $TSS_{HLA-A*02:01-S}$ ) for trained RandM.  
 155 Calculations were performed for all matrices before and after training; (D) Showcase correlation  
 156 and accuracy measurements (see details in the text and figures below).

## 157 **Data Collection**

158 Peptide sequences with affinity for HLA alleles were obtained from the Immune  
159 Epitope Database ([www.iedb.org](http://www.iedb.org)), a common source of training and benchmark data for  
160 predictive models of peptide function [14]. Quartz binders and the Quartz I matrix were  
161 provided by GEMSEC at the MSE Department of the University of Washington [25]. The  
162 Amino Acid Index (AAindex) is a large database of amino acid properties that were used  
163 to calculate the cluster matrices (A-RMat) [32,33]. Within the site, similarity matrices  
164 calculated by various studies are also provided, and it was from here that the SAUSAGE  
165 force-field matrix was also chosen [17]. The PMBEC scoring-matrix [27] was included as  
166 it was derived directly from binding affinity data from MHC-I. In general, the matrices  
167 chosen are a diverse subsection of the types of information used to describe differences  
168 between amino acids and therefore were an appropriate selection for yielding conclusions  
169 about how the seed matrix would affect the overall result.

## 170 **Novel Matrix Calculation**

171 To explore the possibility that certain properties, e.g., hydrophobicity, electrical  
172 properties, amino acid composition etc., may make better seed matrices, 9 similarity  
173 matrices were calculated based on clusters optimized by Saha *et. al* [38]. After grouping  
174 properties by alpha-helix or beta-sheet propensities, composition, electrical, hydrophobic,  
175 and intrinsic characteristics, residue propensity, and physicochemical properties, we  
176 performed Principal Component Analysis (PCA) on each group and all groups combined.  
177 Using a Python library downloaded from [scikit-learn.org](http://scikit-learn.org) [39], the principal components  
178 were calculated which were most representative of the internal variation of property  
179 subset. Because these principal components are orthogonal, Euclidean distance was the



180 most appropriate for calculating the actual similarity matrix. By calculating the difference  
181 between the principal components of two amino acids, we were able to calculate nine (20  
182 x 20) similarity matrices describing their quantitative physiochemical differences. These  
183 matrices will be referred to for the rest of the work as AMat (Alpha-helix propensity), BMat  
184 (Beta-sheet propensity), CMat (Composition), EMat (Electric), HMat (Hydrophobicity),  
185 IMat (Intrinsic propensity), PMat (Physiochemical), RMat (Residue propensity) and  
186 OCSim [Orthogonal Component Similarity matrix (all properties)].

### 187 **Code Implementation**

188 The newest version of the algorithm was written in Python, using a gapless scoring  
189 method to calculate TSS scores. The gap calculation was excluded to rectify the issue  
190 created by the changing gap position in each sequence. Per peptide-peptide scoring  
191 operation (300 strong binders x 9000 peptides for *HLA-A\*02:01*), per iteration (5000 due  
192 to randomly changing mutabilities) the gap is placed in one position. We suspected the  
193 gap made recognizing the consistent amino acids between iterations difficult. The debut  
194 implementation of the method [25] iteratively aligned less than 20 peptides per strong and  
195 weak binding group. The IEDB dataset being substantially larger (i.e., over 9000 peptides  
196 for the largest set) required the inclusion of more peptides per set in order to capture as  
197 many of the features pertaining to binding affinity as possible.

### 198 **Designation of Affinity Classes**

199 The peptide sequences were first ordered by  $-pIC_{50}$ , and then segregated into  
200 groups dependent on their affinity. For example, all peptides within the 3 chosen alleles  
201 (*HLA-A\*02:01* [9-length], *HLA-A\*02:02* [10-length] and *HLA-A\*03:01* [9-length]) with a -  
202  $pIC_{50}$  of 0 were named 'strong' (S) binders, creating 3 sets. The 'weak' (W) binders for

203 the 9-length and 10-length sets were those with a  $-pIC_{50}$  of -5 to -7. From these, 80% of  
204 a strong or weak peptide list was randomly chosen as training sets to obtain cross-  
205 validation. To show the flexibility of the method, we chose several groups with differing  
206 distributions to demonstrate the improvements are still achieved when only partial data is  
207 available.

## 208 **Matrix Training**

209 To begin, two lists of peptide sequences (at least 6 in each) must be obtained, one  
210 with higher 'internal similarity' and lower 'internal similarity'. Critically, peptides with high  
211 binding affinity for the same material will also higher 'internal similarity' and those with low  
212 affinity will have low 'internal similarity' [25]. Internal similarity refers to the sum of Global  
213 Alignment (GA) scores of each peptide within a list to every other peptide within the same  
214 list. Global Alignment is commonly referred to as the Needleman-Wunsch algorithm or  
215 optimal alignment as it always obtains the optimum number and placement of gaps,  
216 resulting in the most similar domains being recognized and aligned when they are  
217 consensus [20]. It requires a similarity matrix to obtain scores between matches or  
218 mismatches of amino acids, and many of these have been calculated throughout the  
219 literature. For small peptides, it may not be the ideal alignment method considering their  
220 short length makes scoring the entire sequence important.

221 While guaranteeing the optimal alignment, Global Alignment is computationally  
222 very expensive and therefore impractical to apply to larger groups of sequences than  
223 those used in previous work [25] (10 - 20 sequences per strong and weak group). The  
224 updated method departs from the alignment methodology and scores peptides by their  
225 positional composition only, which is essentially the same score without the gap

226 calculation. By greatly expanding the number of peptides used in the strong group, the  
227 significance of GA is reduced due to a wider range of domain types and locations being  
228 represented. In general, scoring with more peptides is just as beneficial as scoring a few  
229 with GA. Global Alignment expands the number of sequences a peptide will have  
230 consensus with; in a way making it appear as many peptides in the strong group.  
231 However, the domains being aligned and the values scoring the alignments are different  
232 from one iteration to another, resulting in a lack of consistent scoring between sequence  
233 domains. Therefore, we justify the departure from GA as both a necessity and a benefit  
234 to ensure the method runs within a practical time constraint.

235 The procedure for one iteration can be described in 6 steps (see Fig 2). After the  
236 affinity classes have been designated (Fig 2, Step 2), a seed similarity matrix is used to  
237 calculate  $TSS_{S-S}$  and  $TSS_{S-W}$  (same as internal but to separate group of peptides)  
238 similarity for each peptide (Fig 2, Step 3). External similarity is calculated by aligning the  
239 strong binders to each in the low internal similarity group. Within each list, the average is  
240 found and form the cost functions for IA, the Total Similarity Score Strong-Strong ( $TSS_{S-S}$ )  
241 and Total Similarity Score Strong-Weak ( $TSS_{S-W}$ ), respectively.  
242 Mathematically, the expression for general TSS calculation is given by Equation (1) as

$$243 \quad TSS_{A-B} \left[ |A| \frac{y^a}{x^a} - |B| \frac{y^b}{x^b} \right] = 1/[x^a \times (x^b - \delta_{AB})] \times \sum_{i=1, j=1}^{x^a, x^b} PSS_{ij} (1 - \delta_{ij} \delta_{AB})$$

244 (1)

245 where,  $TSS_{A-B}$  is the Total Similarity Score (TSS) between peptide sets A and B,  $PSS_{ij}$  is  
246 the pairwise similarity score (PSS) between sequences  $i$  and  $j$  of sets A and B  
247 respectively,  $x^a$  and  $x^b$  are the total number of sequences in sets A and B, and  $\delta$  is the  
248 Kronecker delta function ( $\delta_{ij} = 1$  if  $i = j$ , otherwise  $\delta_{ij} = 0$ ).

249 After the values of  $TSS_{S-S}$  and  $TSS_{S-W}$  have been calculated and saved for the first  
250 time, the similarity matrix is perturbed by making random changes (1-20) to the matrix  
251 values by either adding 1 or subtracting 1 (Fig 2, Step 3). Using the new matrix,  $TSS_{S-S}$   
252 and  $TSS_{S-W}$  are calculated again and compared with the previous TSS (Fig 2, Step 4). A  
253 change to the matrix is considered beneficial if  $TSS_{S-S,NEW}$  is greater than  $TSS_{S-S,OLD}$  and  
254  $TSS_{S-W,NEW}$  is less than  $TSS_{S-W,OLD}$ . Beneficial changes are saved for the next round (Fig  
255 2, Step 5). If the change is not beneficial, then the previous matrix (before mutation) is  
256 perturbed again and the process repeats (Fig 2, Step 5). The algorithm could continue  
257 indefinitely but we considered the matrix converged when over 5,000 iterations occurred  
258 without a beneficial change (Fig 2, Step 6).

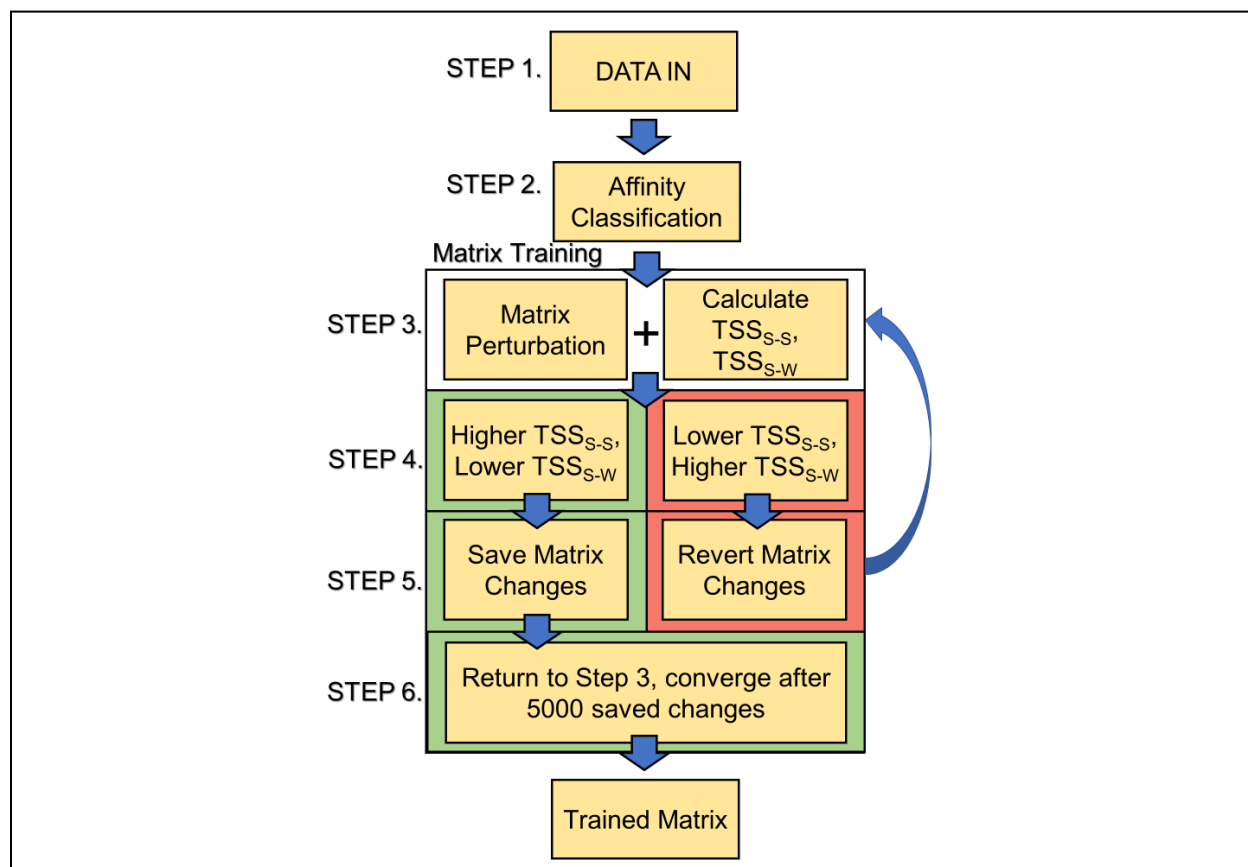

259 **Fig 2. Schematics of matrix training procedure.** Peptides were first downloaded and classified  
260 by their affinity. The similarity matrix is perturbed randomly and then TSS scores are calculated.

261 Depending on the outcome, changes to the matrix were either saved or discarded. The matrix  
262 was considered 'converged' after 5000 beneficial changes total, or 5000 negative changes in a  
263 row, occur.

## 264 **Benchmark with the Previous Work**

265 To prove the updated methodology was up to par with the original implementation  
266 of the procedure, we obtained the Quartz I matrix and silica binding peptides used by  
267 Oren *et. al* [25] The same procedure was followed by mutating PAM250 and training on  
268 the same strong and weak groups. After training, IA converged on a matrix capable of  
269 predicting binding affinity with similar accuracy to the debut implementation [25]. Using a  
270 Pearson correlation of the external similarity to affinity of any silica binding peptide to the  
271 group of strong binders designated by [25], we calculated a 51% correlation with our  
272 matrix. Previous work obtained a 46% correlation with Quartz I, demonstrating the  
273 equivalent capabilities of the updated method. P-values for these correlations were less  
274 than 0.0005.

## 275 **Application to MHC Data**

276 To test whether the modified methodology would perform on organic materials, we  
277 needed a set of peptides with affinity for a biological target. The IEDB provides high quality  
278 sequence data including binding affinities for multiple Major-Histocompatibility  
279 Complexes which provided a perfect opportunity to test performance [14]. By designating  
280 peptides with  $-pIC_{50}$  (negative logarithm of  $IC_{50}$ ) of 0 as strong-binders peptides and weak-  
281 binders having  $-pIC_{50}$  of -5 to -7 (Fig 2, Step 2) from three alleles (*HLA-A\*02:01*, *HLA-*  
282 *A\*03:01*, and *HLA-A\*02:02*), we optimized 14 similarity matrices capable of ranking  
283 peptides by their binding affinities via their total similarity to strong binders. Matrices were

284 optimized by iteratively perturbing a seed similarity matrix and keeping those changes  
285 which ultimately increased the self-similarity of the strong binders and cross-similarity of  
286 the strong with weak binders.

## 287 **Results and Discussions**

288 **Cross-Similarity Analysis.** Fig 3 shows the cross-similarity results of 5 subsets  
289 of peptides deemed Strong (S;  $-pIC_{50}:0$ ), Less Strong (LS;  $-pIC_{50}:-1$  to  $-2$ ), Medium (M;  $-$   
290  $pIC_{50}:-2$  to  $-3$ ), Medium Weak (MW;  $-pIC_{50}:-3$  to  $-4$ ) and Weak (W;  $-pIC_{50}:-5$  to  $-7$ ) based  
291 on their binding affinity to alleles MHC-I *HLA-A\*02:01* for all matrices before and after  
292 training. Each set of bars per matrix was normalized by the largest value of both before  
293 and after results. In addition, these bars are the results of 5 average TSS subsets (80%  
294 randomly chosen from each affinity class). Previous work showed the TSS of a peptide  
295 with high similarity to the peptides that are strong binders of a solid-state material  
296 indicates that the peptide in question likely also has strong binding capability [25].  
297 Therefore, the average TSS of peptides with an affinity for a protein should decrease with  
298 their experimental affinity. Fig 3 shows that before training (yellow bars) the trend is  
299 somewhat present but not very defined (Strong x Weak is comparable to Strong x Less-  
300 Weak) but after training (blue bars) the trend is very pronounced. For each matrix and  
301 across all three alleles (see S1 and S2 Figs) we observe average TSS when grouped by  
302 affinity class to strong binders correlated with experimental affinity. Most notably, the  
303 randomly initialized matrix RandM despite having no initial correlation was able to show  
304 the trend as definitively as the others after matrix training.

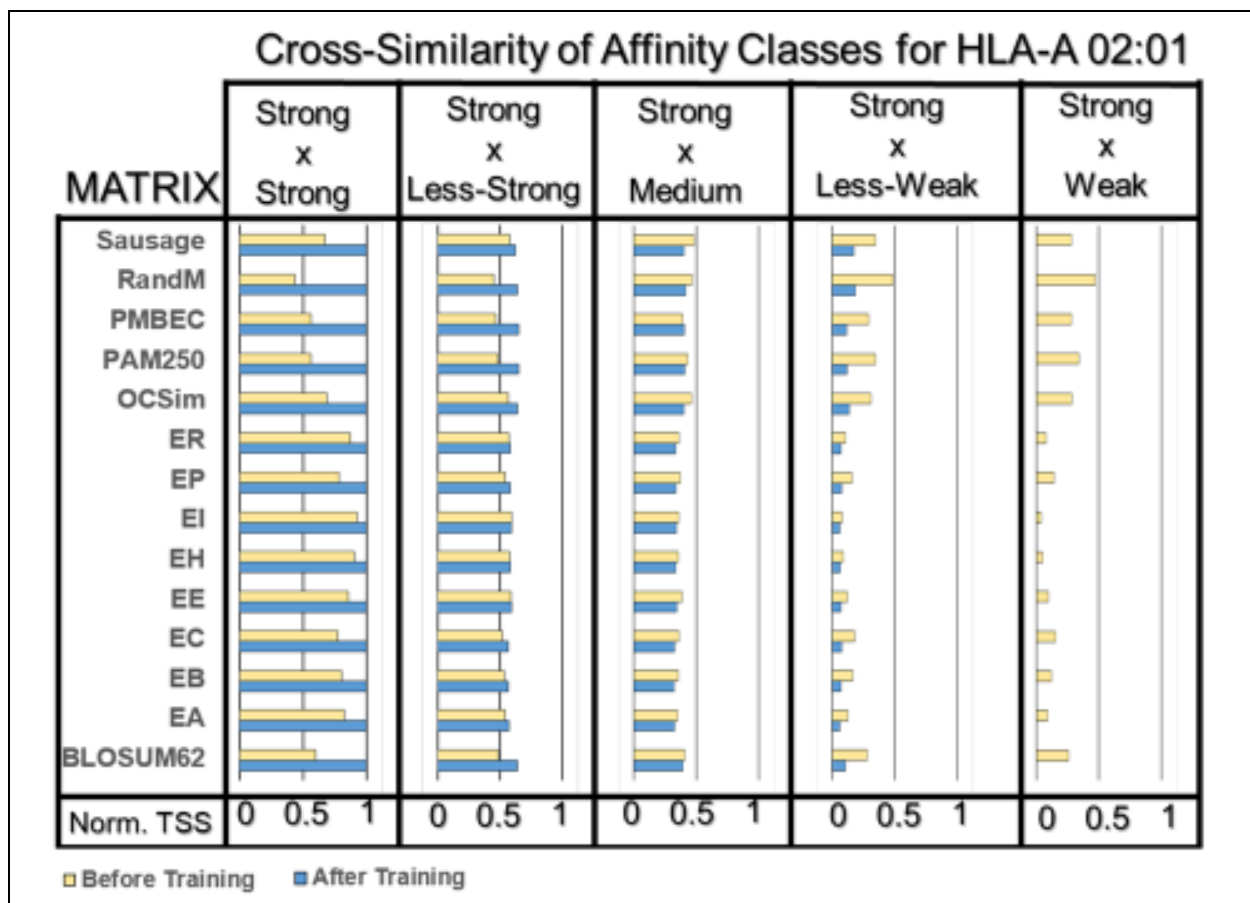

305 **Fig 3. External similarity results for matrices before and after training with *HLA-A***  
 306 ***02:01* binders.** Five subsets of peptides were created from the full list from each allele. Blue  
 307 bars represent after training and yellow before training. The TSS for each group to strong binders  
 308 ( $TSS_{S-LS,M,MW,W}$ ) was calculated in addition to each group to itself ( $TSS_{S-S}$ ,  $TSS_{LS-LS}$ ,  $TSS_{M-M}$ ,  
 309  $TSS_{MW-MW}$ ,  $TSS_{W-W}$ ). The y-axis for each bar chart denotes the matrix, the x-axis is the normalized  
 310  $TSS_{S-S,LS,M,MW,W}$  values. The results show, especially in RandM's case, that we can improve  
 311 similarity matrices to predict a trend correlated to binding affinity. This trend is characterized by  
 312 decreasing  $TSS_{S-S,LS,M,MW,W}$  correlating with decreasing binding affinity.

313 **Correlations with experimental affinity.** In the previous work, binding affinity was  
 314 predicted by placing peptides into semi-quantitative groups of strong, medium and weak  
 315 by their total similarity score to the strong binding peptide sequences of quartz [25]. The  
 316 trend of decreasing  $TSS_{Seq-S}$  was correlated with experimental affinity by using  $TSS_{Seq-S}$

317 as a threshold to determine whether a peptide would fall into an affinity class (binary  
318 classification) [25]. Though significant predictability (70-80%) was obtained using the  
319 semi-quantitative scoring method, it falls short of the trend prediction needed to be  
320 comparable with MHCFlurry, NetMHC and DeepMHC [12,13,37]. To enable more direct  
321 comparisons the Pearson correlation coefficient (linear, Fig 4C) and Spearman rank  
322 correlation coefficient (nonlinear, Fig 4B) were calculated, which can determine whether  
323 the predicted binding affinity trend (TSS to strong binders) matches the experimental  
324 binding affinity trend. In addition, a classifier scheme is included that can recognize  
325 whether a peptide is a strong or weak binder by the magnitude of its  $TSS_{Seq-S}$ . Further, a  
326 root mean square error (RMSE) is calculated from the normalized trend of TSS and RMSE  
327 to get an idea of close the TSS scores are to the experimental affinity (Fig 4A).

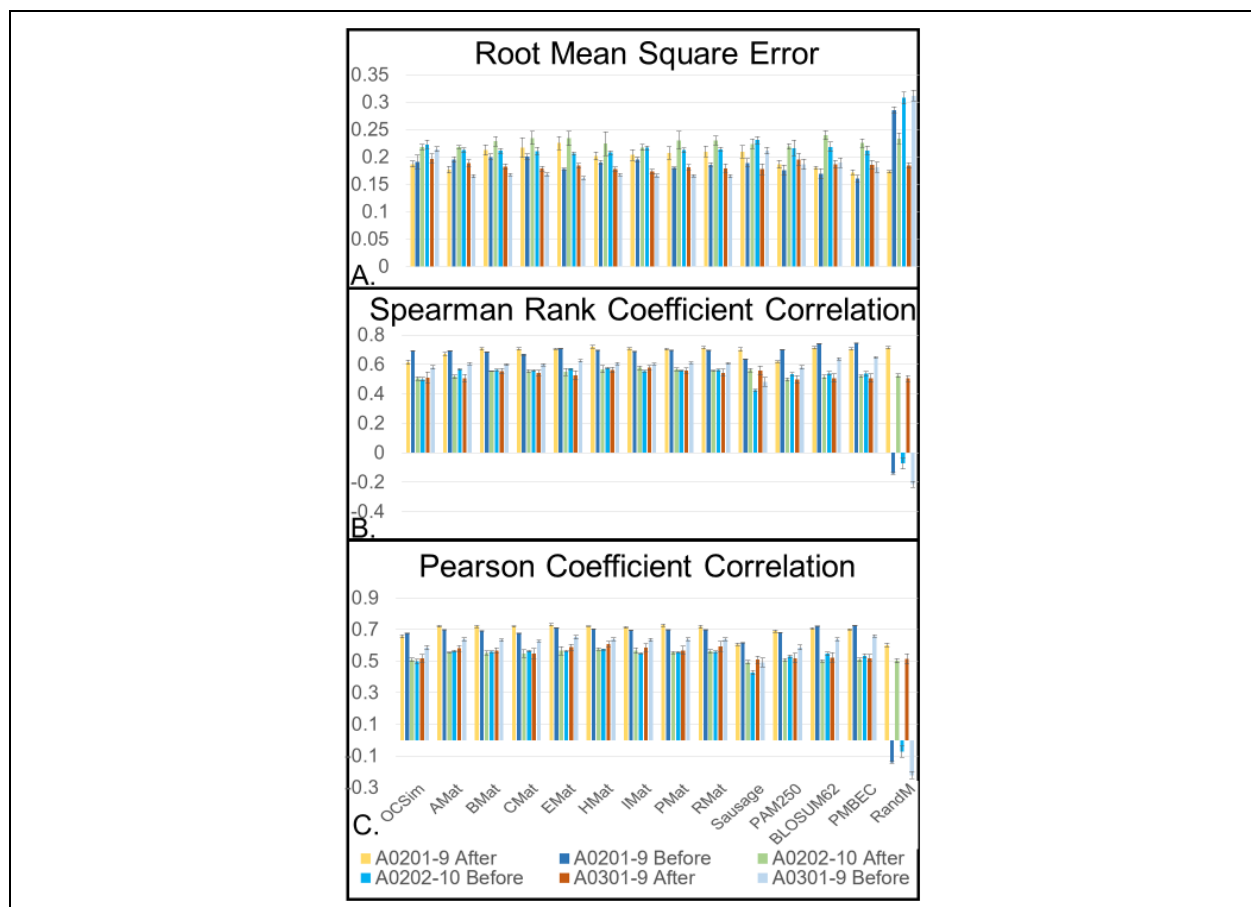



328 **Fig 4. RMSE (A), Spearman Rank (B), and Pearson (C) correlations for TSS trends**  
329 **calculated using trained and untrained matrices.** The  $TSS_{Seq-S}$  of the *HLA-A\*02:01* list was  
330 calculated by aligning each peptide with the top binders of the allele and correlating the list of  
331 values with the list of experimentally determined binding affinities using linear (Pearson, Fig 4C)  
332 and nonlinear (Spearman Rank, Fig 4B) methods. RMSE (Fig 4A) is calculated by obtaining the  
333 root mean square of the difference between the normalized (0-1)  $-pIC_{50}$  and  $TSS_{Seq-S}$ . Error bars  
334 are 1 standard deviation from the average of each set. The data shows the method can improve  
335 literature and calculated matrices, most significantly that a trained randomly initialized matrix  
336 (RandM) is more reflective of mutability information in the MHC-I context than all literature and  
337 calculated matrices before training.

338  $TSS_{Seq-S}$  were then correlated with those of the experimental affinity. The values  
339 of  $TSS_{Seq-S}$  served as the predicted binding affinity ranking and was correlated with the  
340 experimentally determined binding affinity using Pearson and Spearman Rank functions.  
341 Fig 4 shows the score of each correlation for trained matrices and untrained matrices.  
342 The error bars are one standard deviation from the average of these scores. All p-values  
343 were less than 0.0005, except for in the case of RandM. Considering the substantially  
344 less amount of data used (~350 peptide sequences for *HLA-A\*02:01*) compared with  
345 DeepMHC and NetMHC (80% of the full set; ~7200 sequences for *HLA-A\*02:01*), the  
346 range of 0.5-0.7 is significant and is reflective of mutability information being captured. In  
347 addition, the RMSE scores show that in general one TSS score is insufficient to describe  
348 the exact binding affinity. While it is clear from the improvement in Pearson and Spearman  
349 Rank correlation that these matrices are capturing some similarity information using the  
350 method, no matrix alone can produce a TSS ranking exactly correlating with the rest of  
351 the set. The integration of several TSS rankings into a single score could prove to be a

352 relevant predictor if they are capturing diverse similarity information unique to their matrix  
 353 values.

354 **Binary Classification.** Sensitivity and specificity were also recorded as a measure  
 355 of binary prediction accuracy, shown in Fig 5A and Fig 5B respectively. A  
 356 binder/nonbinder classification was performed via observing peptides conserved as  
 357 binders through the magnitude of their TSS<sub>S-Seq</sub>. The sequences having greater than 500  
 358 IC<sub>50</sub> [12] were considered binders. Therefore, peptides given a predicted ranking above  
 359 the TSS<sub>S-Seq</sub> threshold correlating with the 500 IC<sub>50</sub> [12] bar were considered predicted  
 360 binders. True positives and negatives, and false positive and negatives were calculated  
 361 by observing which predicted binders were also in the actual binder group.

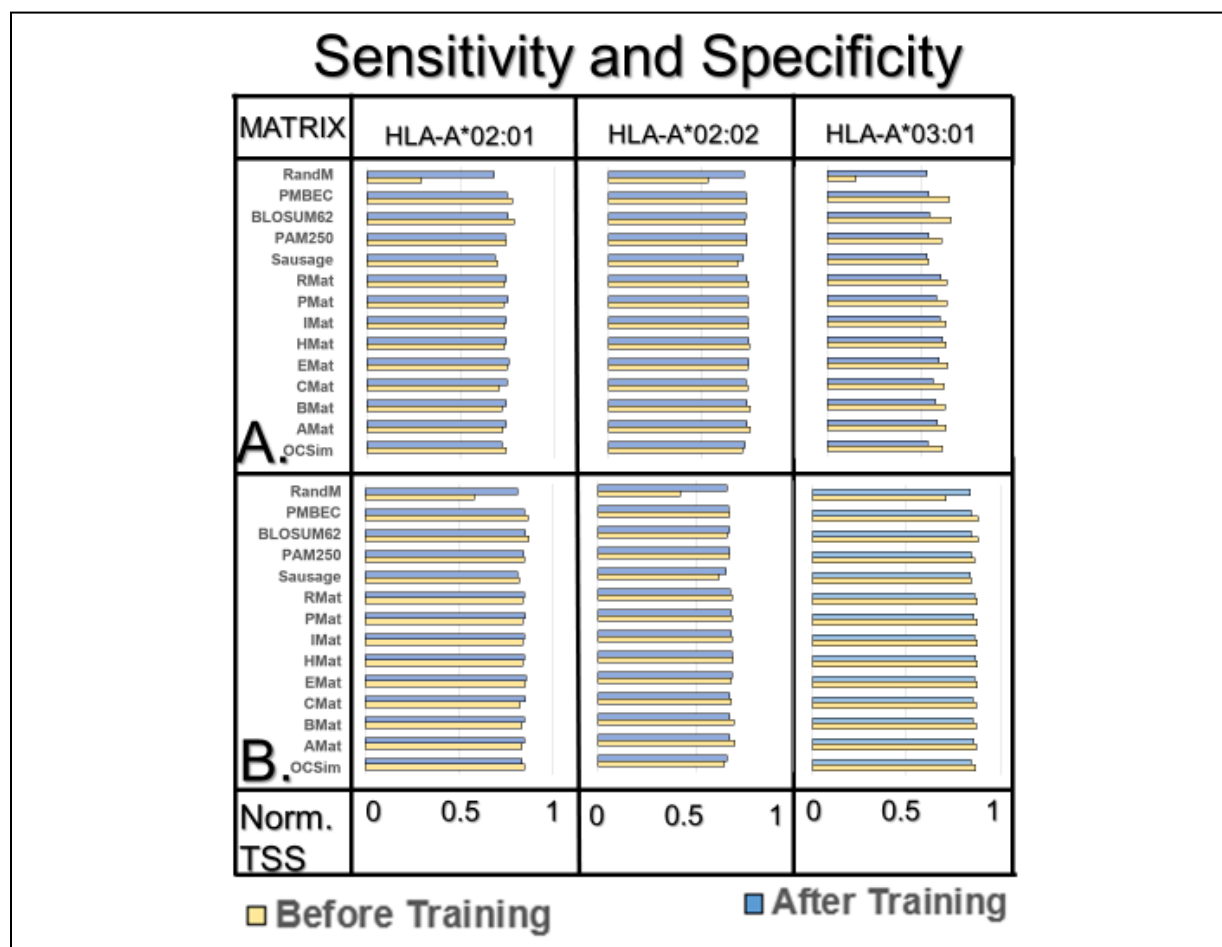

362 **Fig 5. Results of classification analysis.** Sensitivity (A) and specificity (B) measures  
363 calculated from the results of binary classification of binding. In general, these results show the  
364 training function did not improve the predictive ability of any matrix besides RandM, providing  
365 evidence that TSS is a relevant predictor while noting the training operation is an ineffective  
366 application of TSS.

367 Across all the matrices a similar specificity/sensitivity was observed before and  
368 after training. This indicates the cost function did not improve the ability of the  
369 calculated/literature matrices to classify peptides based on TSS values. RandM showed  
370 marked improvement across all the alleles but yields lower accuracies than other  
371 matrices. This demonstrates that information can be integrated into a similarity matrix up  
372 to a limit. In general, the prediction metrics show that the separation of TSS<sub>S-S</sub> and TSS<sub>S-</sub>  
373 <sub>w</sub> may not be the appropriate cost function to improve a predictive model. However,  
374 TSS<sub>Seq-S</sub> is a highly relevant predictor of affinity. Though the model was trained on only  
375 the dominant features of the peptide set represented by strong binders, the affinity trend  
376 was generally conserved by TSS<sub>S-Seq</sub> scoring.

## 377 **Conclusions and Future Work**

378 The predicted correlation range of 0.5-0.7 determined by Pearson and Spearman  
379 Rank of the similarity matrix methodology demonstrates similarity matrices can predict  
380 functionality (i.e. solid substrate binding specificity) of peptides using the Total Similarity  
381 Score. Previous work provided definitive evidence concluding the average similarity score  
382 (TSS) of a peptide towards strong binding peptides of an inorganic solid material is  
383 positively correlated with the binding affinity of that peptide. Using the Total Similarity  
384 Score, we modified a computational method and applied it to a substantially larger dataset

385 to demonstrate that across organic and inorganic materials the metric applies. Though  
386 we use substantially lower training data than other methods, similarity matrices were  
387 obtained that recognize the dominant features of the strongest binding peptides, which in  
388 turn describe those of the weaker binders. Therefore, the strongest binders of the full set  
389 can adequately describe the behavior of the remaining peptides. Though the training  
390 method is insufficient to produce a trend capable of ranking affinity with comparable  
391 accuracy to other MHC predictors, we postulate that based on the diversity of the matrices  
392 trained that they are capturing different subsections of the total similarity information.  
393 Therefore, integrating the trends of multiple matrices into a single score would produce  
394 comparable accuracy even when trained on substantially less data. In this work, we show  
395 that we can capture similarity information using different matrices and that TSS to strong  
396 binders is a relevant predictor of affinity in both organic and inorganic systems.

397 To uncover the relationship between  $TSS_{Seq-S}$  and the experimentally measured  
398 affinity, the future work would involve integrating the TSS score with recent statistical  
399 learning techniques. If the matrix cannot be optimized, then the value of  $TSS_{Seq-S}$  may not  
400 be the highest achievable even if the sequence is a strong binder. The sequences with  
401 amino acids in similar positions to the strong binding group will, however, tend to give the  
402 same average score. Therefore, if the goal is to predict the similarity of sequences based  
403 on their positional composition, conserving the common score range will also retain their  
404 sequence information. An additional problem may also arise when considering the  
405 diversity of the strong binding group. If a given peptide is a strong binder having a  
406 completely unique sequence compared to those of the other strong-binding peptides, it  
407 will have a low  $TSS_{Seq-S}$ . TSS scoring assumes that weak and medium binders are

408 mutations of stronger binders. Future methods will capitalize on the information hidden  
409 within weak/medium binders and use it to describe the full strong binding space. The full  
410 results, gapless Iterative Alignment Python program for calculating similarity matrices,  
411 and all the data used to train the matrices are located online on GitHub  
412 (<https://github.com/Sarikaya-Lab-GEMSEC/Iterative-Alignment-Gapless>).

## 413 **Acknowledgements**

414 We appreciate the data sets and computational facilities provided GEMSEC labs at the  
415 University of Washington.

416

417 We declare there were no conflicts of interest for this work.

## 418 **References**

- 419 1. Georgoulia PS, Glykos NM. Molecular simulation of peptides coming of age:  
420 Accurate prediction of folding, dynamics and structures. Archives of Biochemistry  
421 and Biophysics. 2019;664:76-88.
- 422 2. Minami S, Sawada K, Chikenji G. MICAN: a protein structure alignment  
423 algorithm that can handle Multiple-chains, Inverse alignments, C $\alpha$  only models,  
424 Alternative alignments, and Non-sequential alignments. BMC Bioinformatics.  
425 2013;14(1):24.
- 426 3. Muthukrishnan S, Puri M. Harnessing the evolutionary information on oxygen  
427 binding proteins through Support Vector Machines based modules. BMC  
428 Research Notes. 2018;11(1).

- 429 4. Nakai K, Kidera A, Kanehisa M. Cluster analysis of amino acid indices for  
430 prediction of protein structure and function. "Protein Engineering, Design and  
431 Selection". 1988;2(2):93-100.
- 432 5. Khatayevich D, Page T, Gresswell C, Hayamizu Y, Grady W, and Sarikaya M,  
433 Selective Detection of Target Proteins by Peptide-Enabled Graphene Biosensor,  
434 Small, 2014; 10(8): 1505-1513.
- 435 6. Hayamizu Y, So CR, Dag S, Page TS, Starkebaum D, Sarikaya M. Bioelectronic  
436 interfaces by spontaneously organized peptides on 2D atomic single layer  
437 materials. Scientific Reports. 2016 Sep 22;6:33778.
- 438 7. Fosgerau K, Hoffmann T. Peptide therapeutics: current status and future  
439 directions. Drug Discovery Today. 2015;20(1):122-128.
- 440 8. Barbosa AJM, Oliveira AR, Roque ACA. Protein- and Peptide-Based Biosensors  
441 in Artificial Olfaction. *Trends Biotechnol.* 2018;36(12):1244–1258.  
442 doi:10.1016/j.tibtech.2018.07.004
- 443 9. Hughes ZE, Walsh TR. What makes a good graphene-binding peptide?  
444 Adsorption of amino acids and peptides at aqueous graphene interfaces. Journal  
445 of Materials Chemistry B. 2015;3(16):3211-21.
- 446 10. Sarikaya M, Tamerler C, Jen AK-Y, Schulten K, Baneyx F. Molecular  
447 biomimetics: nanotechnology through biology. Nature Materials. 2003;2(9):577–  
448 85.
- 449 11. Jurtz V, Paul S, Andreatta M, Marcatili P, Peters B, Nielsen M. NetMHCpan-  
450 4.0: Improved Peptide–MHC Class I Interaction Predictions Integrating Eluted

- 451 Ligand and Peptide Binding Affinity Data. *The Journal of Immunology*.  
452 2017;199(9):3360-8.
- 453 12. Hu J, Liu Z. DeepMHC: Deep Convolutional Neural Networks for High-  
454 performance peptide-MHC Binding Affinity Prediction. Cold Spring Harbor  
455 Laboratory; 2017.
- 456 13. Odonnell TJ, Rubinsteyn A, Bonsack M, Riemer AB, Laserson U,  
457 Hammerbacher J. MHCflurry: Open-Source Class I MHC Binding Affinity  
458 Prediction. *Cell Systems*. 2018;7(1).
- 459 14. Vita R, Mahajan S, Overton JA, Dhanda SK, Martini S, Cantrell JR, et al. The  
460 Immune Epitope Database (IEDB): 2018 update. *Nucleic Acids Research*.  
461 2018;47(D1).
- 462 15. Wang S, Ma J, Peng J, Xu J. Protein structure alignment beyond spatial  
463 proximity. *Scientific Reports*. 2013;3(1).
- 464 16. Wright ES. DECIPHER: harnessing local sequence context to improve protein  
465 multiple sequence alignment. *BMC Bioinformatics*. 2015;16(1).
- 466 17. Dosztanyi Z, Torda AE. Amino acid similarity matrices based on force fields.  
467 *Bioinformatics*. 2001;17(8):686-99.
- 468 18. Dasetty S, Barrows JK, Sarupria S. Adsorption of Amino Acids on Graphene:  
469 Assessment of Current Force Fields. American Chemical Society (ACS); 2019.
- 470 19. Alford RF, Leaver-Fay A, Jeliazkov JR, O'Meara MJ, DiMaio FP, Park H, et al.  
471 The Rosetta all-atom energy function for macromolecular modeling and design. *J*  
472 *Chem Theory Comput*. 2017;13(6):3031–48.

- 473 20. Needleman SB, Wunsch CD. A general method applicable to the search for  
474 similarities in the amino acid sequence of two proteins. *Journal of Molecular*  
475 *Biology*. 1970;48(3):443-53.
- 476 21. Jones DT, Taylor WR, Thornton JM. The rapid generation of mutation data  
477 matrices from protein sequences. *Bioinformatics*. 1992;8(3):275-82.
- 478 22. Brown P, Pullan W, Yang Y, Zhou Y. Fast and accurate non-sequential protein  
479 structure alignment using a new asymmetric linear sum assignment heuristic.  
480 *Bioinformatics*. 2015;32(3):370-7.
- 481 23. Deorowicz S, Debudaj-Grabysz A, Gudyś A. FAMSA: Fast and accurate  
482 multiple sequence alignment of huge protein families. *Scientific Reports*.  
483 2016;6(1).
- 484 24. Thompson JD, Higgins DG, Gibson TJ. CLUSTAL W: improving the sensitivity  
485 of progressive multiple sequence alignment through sequence weighting, position-  
486 specific gap penalties and weight matrix choice. *Nucleic Acids Research*.  
487 1994;22(22):4673–80.
- 488 25. Oren EE, Tamerler C, Sahin D, Hnilova M, Seker UOS, Sarikaya M, et al. A  
489 novel knowledge-based approach to design inorganic-binding peptides.  
490 *Bioinformatics*. 2007;23(21):2816-22.
- 491 26. Keul F, Hess M, Goesele M, Hamacher K. PFASUM: a substitution matrix from  
492 Pfam structural alignments. *BMC Bioinformatics*. 2017;18(1).
- 493 27. Kim Y, Sidney J, Pinilla C, Sette A, Peters B. Derivation of an amino acid  
494 similarity matrix for peptide:MHC binding and its application as a Bayesian prior.  
495 *BMC Bioinformatics*. 2009;10(1):394.



- 496 28. Andreatta M, Nielsen M. Gapped sequence alignment using artificial neural  
497 networks: application to the MHC class I system. *Bioinformatics*. 2015;32(4):511-  
498 7
- 499 29. Han Y, Kim D. Deep convolutional neural networks for pan-specific peptide-  
500 MHC class I binding prediction. *BMC Bioinformatics*. 2017;18(1).
- 501 30. Liang G, Yang L, Chen Z, Mei H, Shu M, Li Z. A set of new amino acid  
502 descriptors applied in prediction of MHC class I binding peptides. *European*  
503 *Journal of Medicinal Chemistry*. 2009;44(3):1144-54.
- 504 31. Hess M, Keul F, Goesele M, Hamacher K. Addressing inaccuracies in  
505 BLOSUM computation improves homology search performance. *BMC*  
506 *Bioinformatics*. 2016;17(1).
- 507 32. Kawashima S. AAindex: Amino Acid index database. *Nucleic Acids Research*.  
508 2000;28(1):374-.
- 509 33. Kawashima S, Pokarowski P, Pokarowska M, Kolinski A, Katayama T,  
510 Kanehisa M. AAindex: amino acid index database, progress report 2008. *Nucleic*  
511 *Acids Research*. 2007;36(Database):D202-D5.
- 512 34. Hemmateenejad B, Miri R, Elyasi M. A segmented principal component  
513 analysis—regression approach to QSAR study of peptides. *Journal of Theoretical*  
514 *Biology*. 2012;305:37-44.
- 515 35. Atchley W, Zhao J, Fernandes A, Druke T. Solving the protein sequence metric  
516 problem. *Proceedings of the National Academy of Sciences*. 2005;102(18):6395-  
517 6400.

- 518 36. Doytchinova IA, Walshe V, Borrow P, Flower DR. Towards the chemometric  
519 dissection of peptide – HLA-A\*0201 binding affinity: comparison of local and global  
520 QSAR models. *Journal of Computer-Aided Molecular Design*. 2005;19(3):203-12.
- 521 37. Dogan S, Fong H, Yucesoy DT, Cousin T, Gresswell C, Dag S, Huang G,  
522 Sarikaya M. Biomimetic tooth repair: amelogenin-derived peptide enables in vitro  
523 remineralization of human enamel. *ACS Biomaterials Science & Engineering*.  
524 2018 Mar 9;4(5):1788-96.
- 525 38. Saha I, Maulik U, Bandyopadhyay S, Plewczynski D. Fuzzy clustering of  
526 physicochemical and biochemical properties of amino Acids. *Amino Acids*.  
527 2011;43(2):583-594.
- 528 39. Pedregosa F, Varoquaux G, Gramfort A, Michel V, Thirion B, Grisel O et. al.  
529 Scikit-learn: Machine learning in Python. *Journal of machine learning research*.  
530 2011;12(Oct):2825-30.
- 531
- 532
- 533
- 534
- 535
- 536
- 537
- 538
- 539
- 540
- 541
- 542

543 **Supporting Information**

544 **S1 Fig. Cross-similarity results for the HLA-02:02 allele.** Each bar chart shows the  
545 average normalized TSS of the “Strong” affinity class with itself and each other class. The  
546 decreasing trend similarity of “Strong” peptides with those of decreasing affinity  
547 demonstrates the successful optimization of each matrix for the HLA-A\*02:02 allele.

548 **S2 Fig. Cross-similarity results for the HLA-03:01 allele.** Each bar chart shows the  
549 average normalized TSS of the “Strong” affinity class with itself and each other class. The  
550 decreasing trend similarity of “Strong” peptides with those of decreasing affinity  
551 demonstrates the successful optimization of each matrix for the HLA-A\*03:01 allele.

# Sensitivity and Specificity

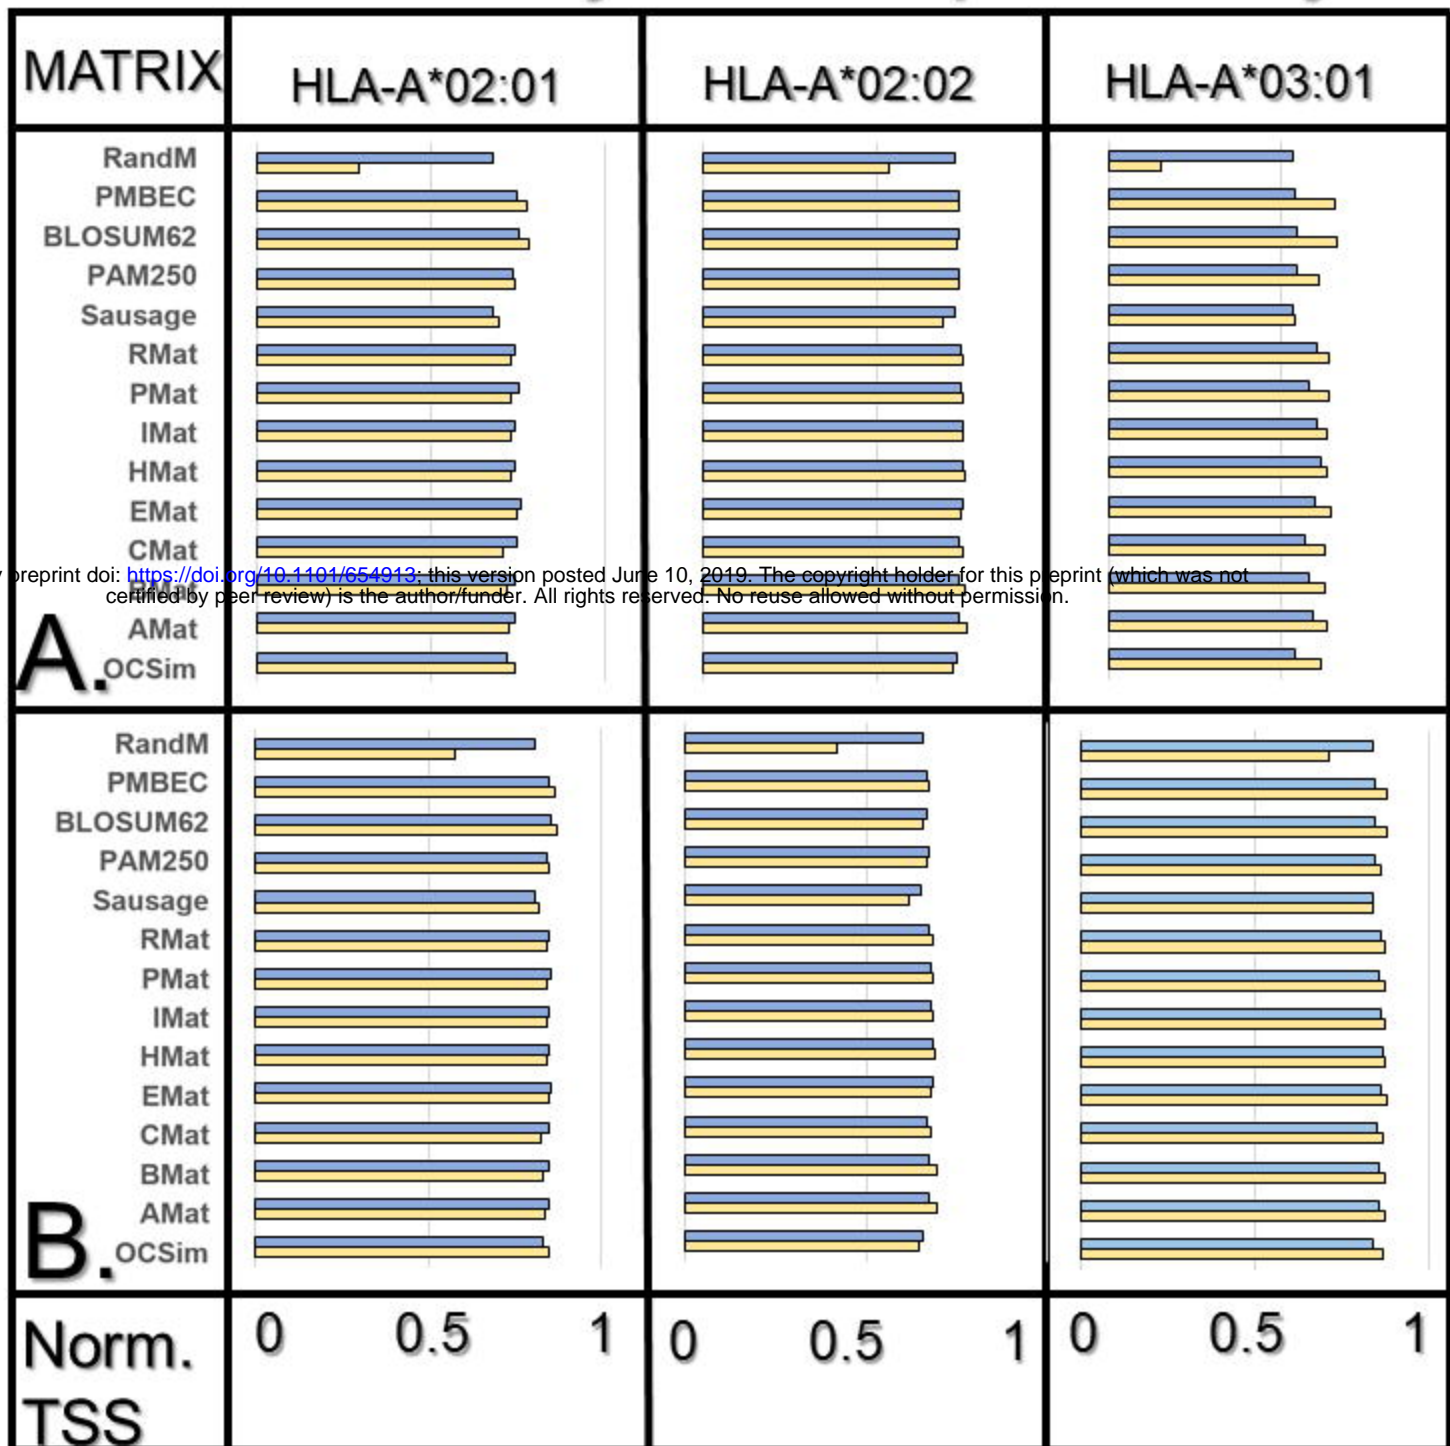

■ Before Training

■ After Training

bioRxiv preprint doi: <https://doi.org/10.1101/654913>; this version posted June 10, 2019. The copyright holder for this preprint (which was not certified by peer review) is the author/funder. All rights reserved. No reuse allowed without permission.

## A. Data Collection

### MHC-1 Affinity Class

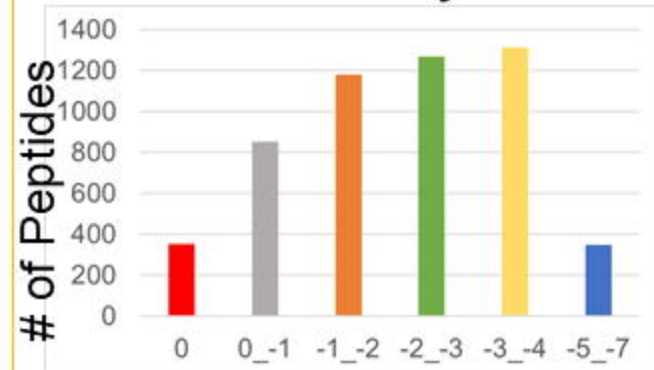

-pIC<sub>50</sub> Class

BLOSUM 62; Pam 250

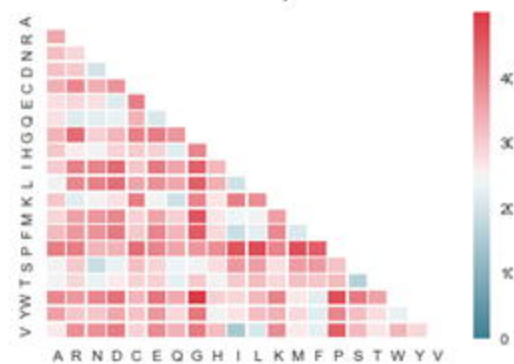

## B. Matrix Training

### Trendless Matrix

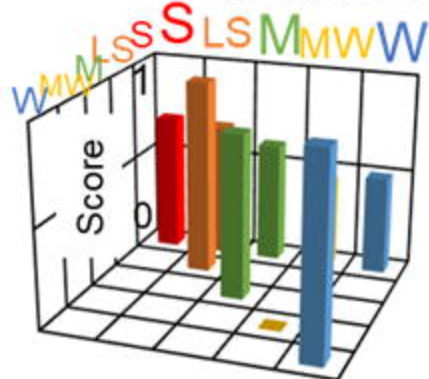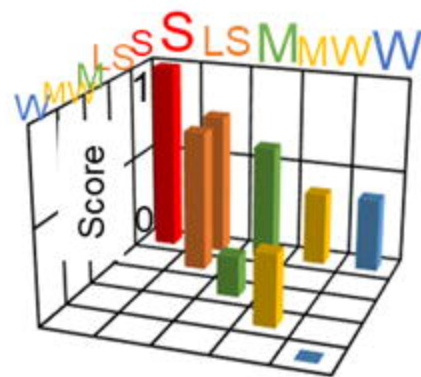

Trendy Matrix

## C. Similarity Calculation

### Novel Similarity Matrices (14)

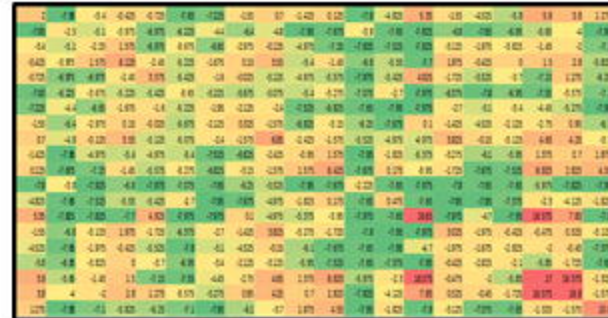

TSS Distribution

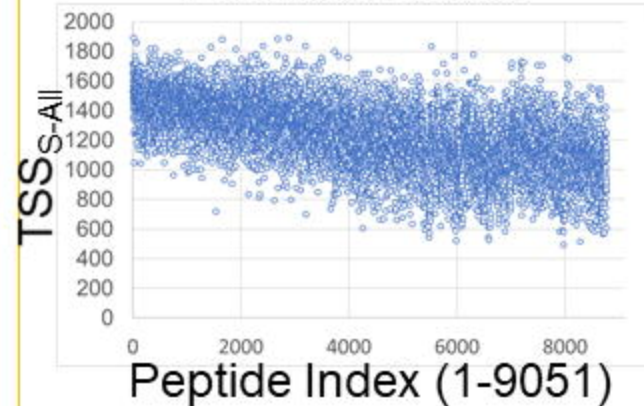

## D. Predictive Functionality

Pearson Coefficient Correlation

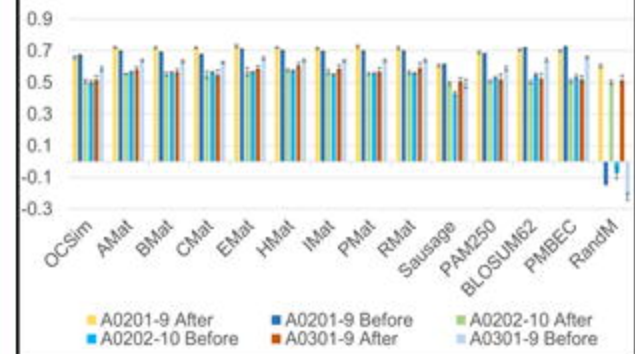

Sensitivity

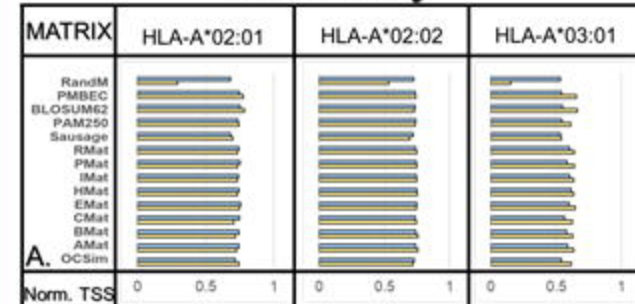

STEP 1.

DATA IN

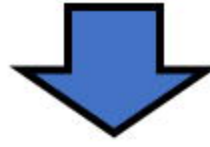

STEP 2.

Affinity  
Classification

Matrix Training

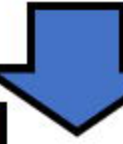

STEP 3.

Matrix  
Perturbation

+

Calculate  
 $TSS_{S-S}$ ,  
 $TSS_{S-W}$

bioRxiv preprint doi: <https://doi.org/10.1101/654913>; this version posted June 10, 2019. The copyright holder for this preprint (which was not certified by peer review) is the author/funder. All rights reserved. No reuse allowed without permission.

STEP 4.

Higher  $TSS_{S-S}$ ,  
Lower  $TSS_{S-W}$

Lower  $TSS_{S-S}$ ,  
Higher  $TSS_{S-W}$

STEP 5.

Save Matrix  
Changes

Revert Matrix  
Changes

STEP 6.

Return to Step 3, converge after  
5000 saved changes

Trained Matrix

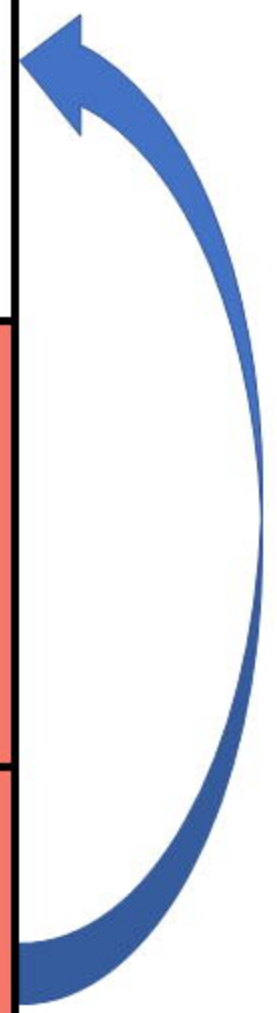

## Cross-Similarity of Affinity Classes for HLA-A 02:01

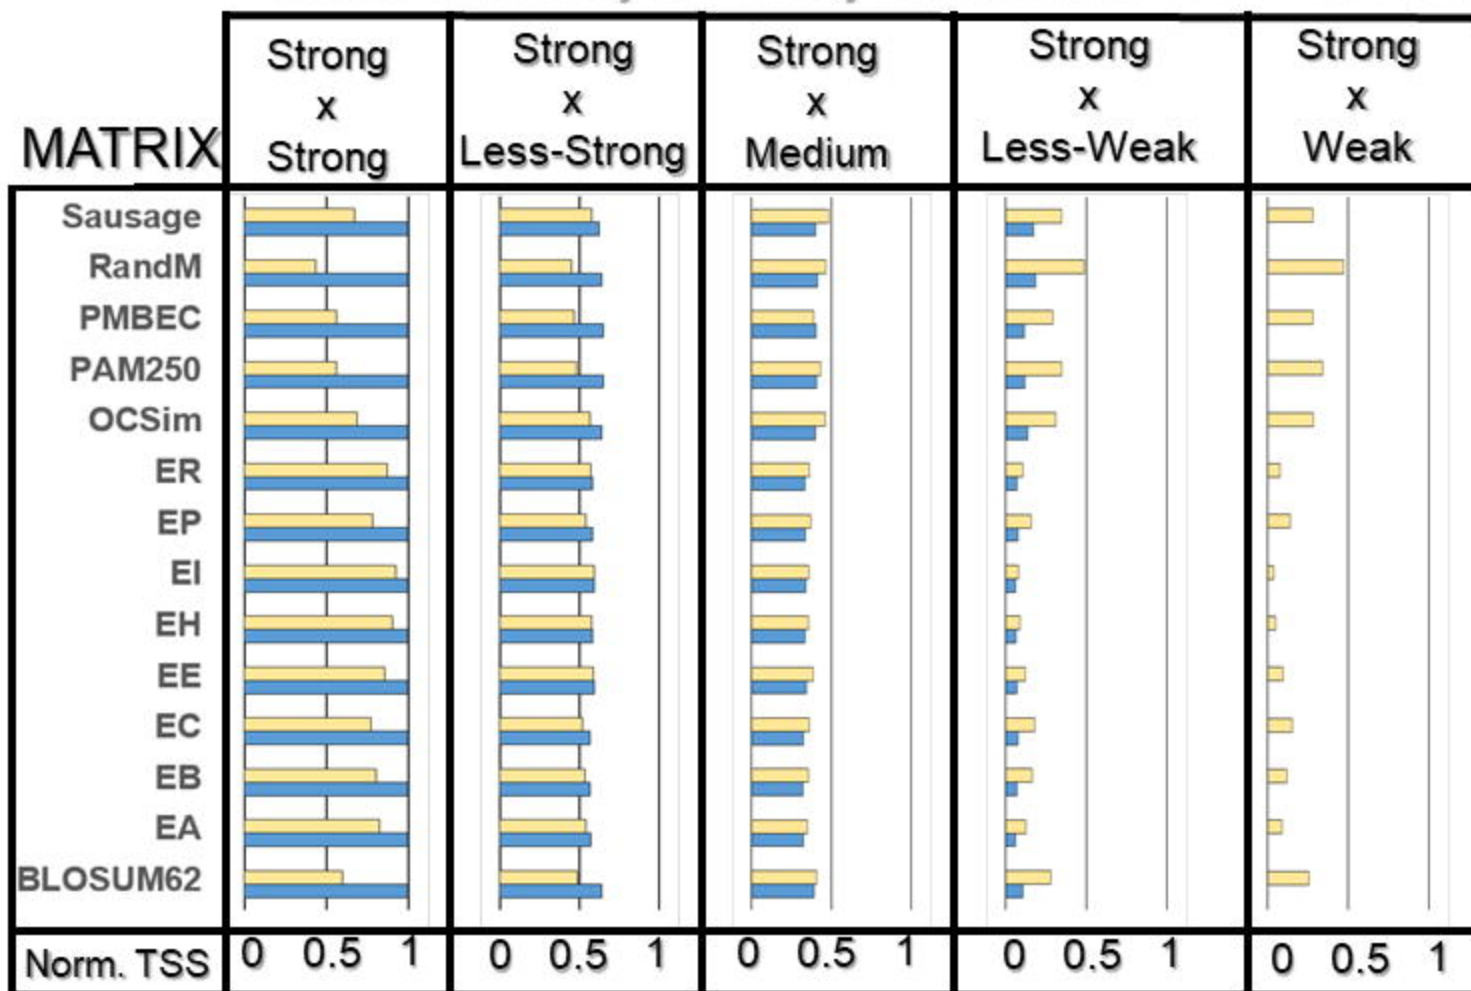

■ After Training ■ Before Training

# Root Mean Square Error

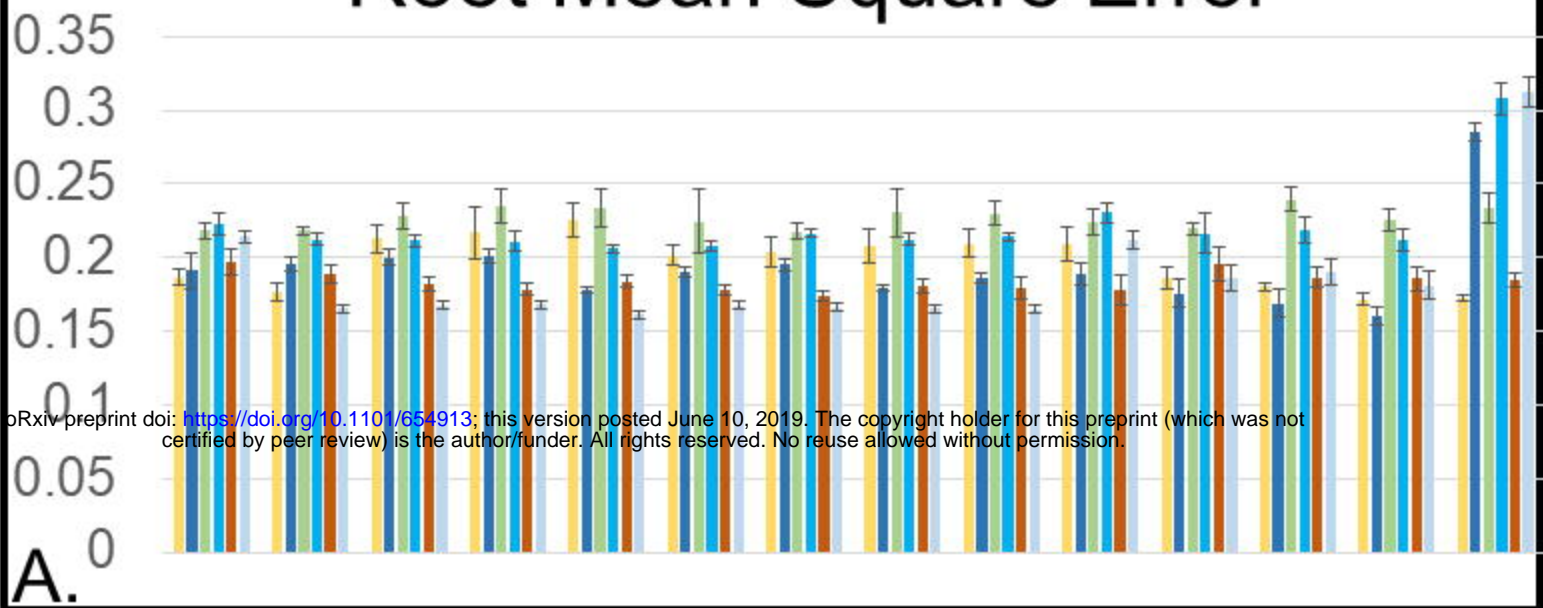

# Spearman Rank Coefficient Correlation

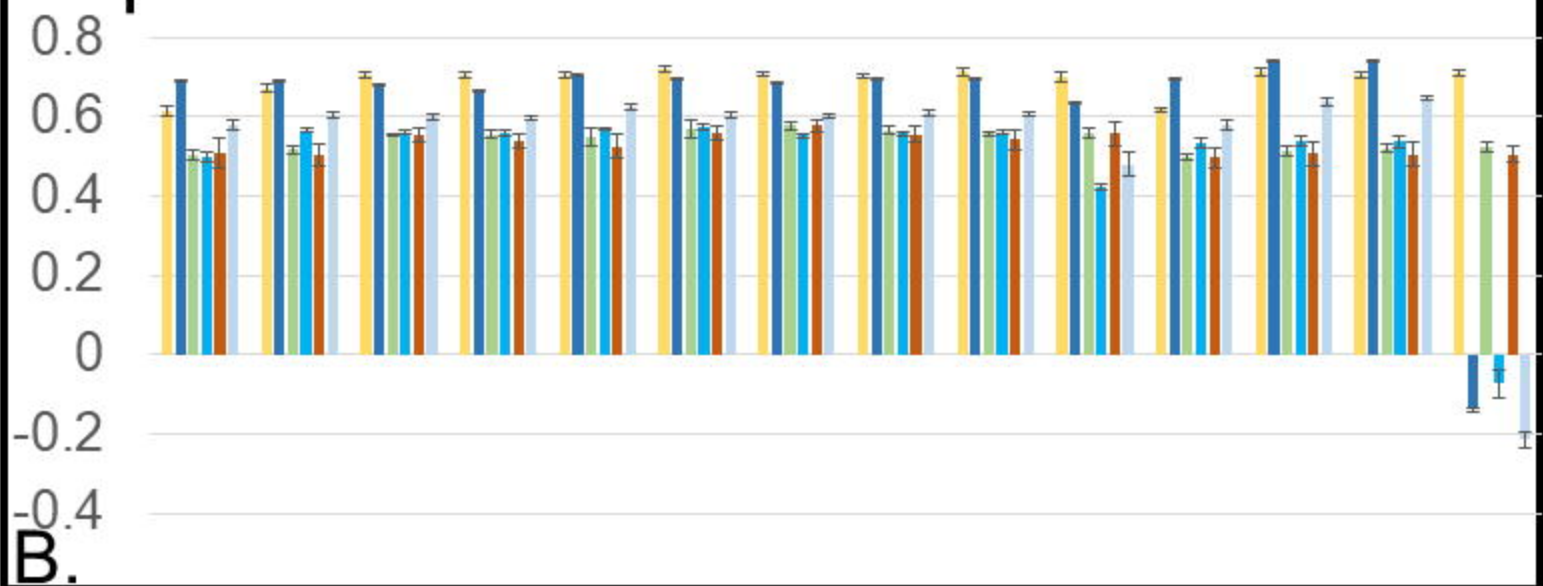

# Pearson Coefficient Correlation

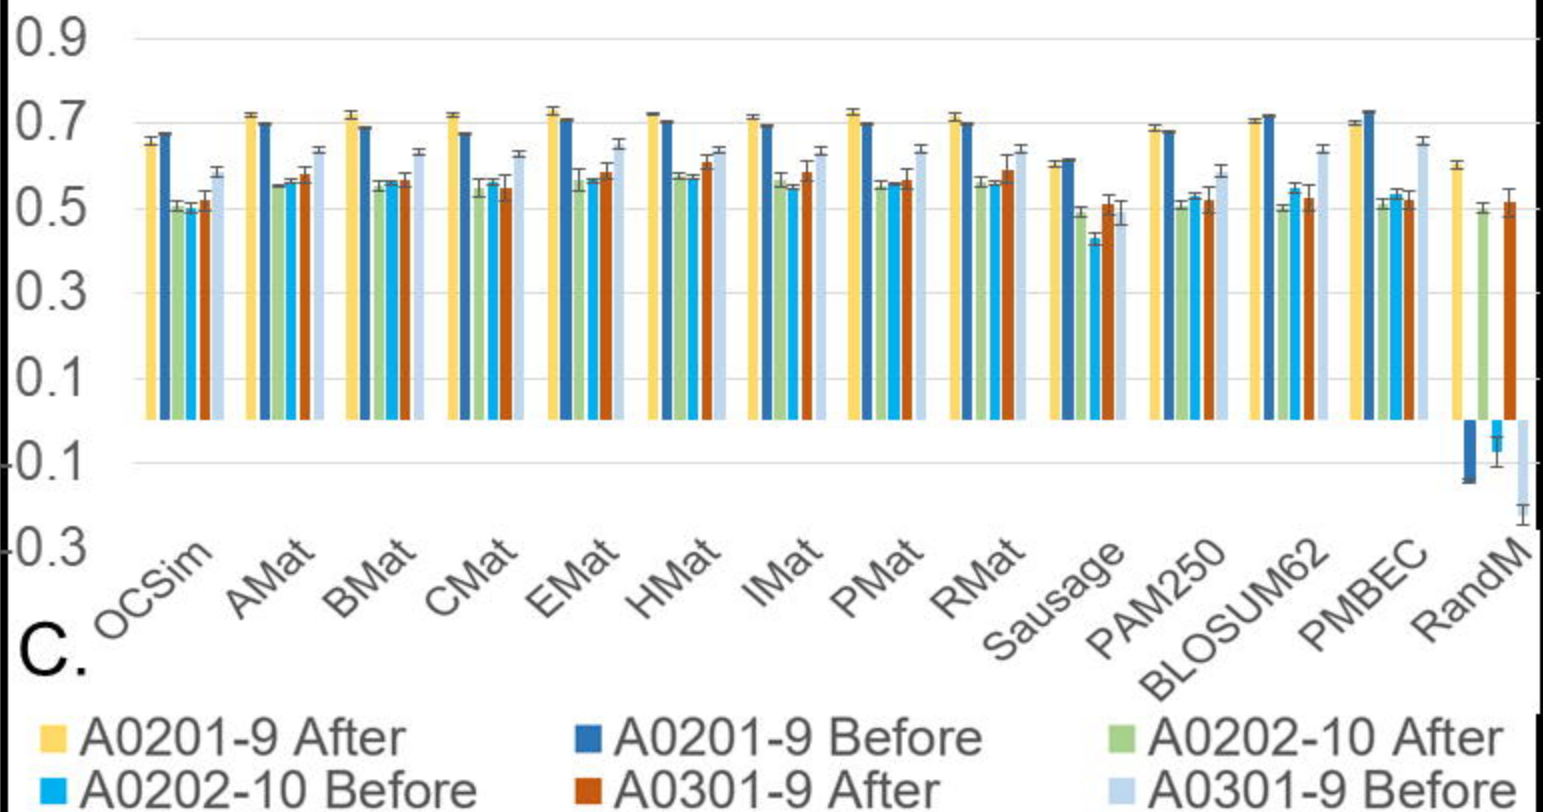

Source: http://biorxiv.org/content/10.1101/654913v1.full.pdf
